# Supplementary material for: Exterior covariant derivatives for an extended Cartan theory
Source: Springer Nature journal article supplement (doi:10.1186/s12936-016-1669-8), 1996-01-01

# ANEX I

1. Abnormal curves interpreted as positive by the turbidimeter but considered negative in control negative specimens tested with the PAN probe

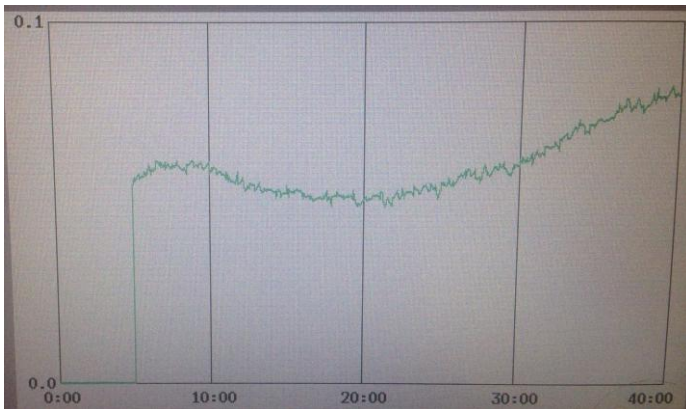

2. Abnormal curves interpreted as positive by the turbidimeter but considered negative in P ovale positive specimens tested with the Pf probe (black lines)

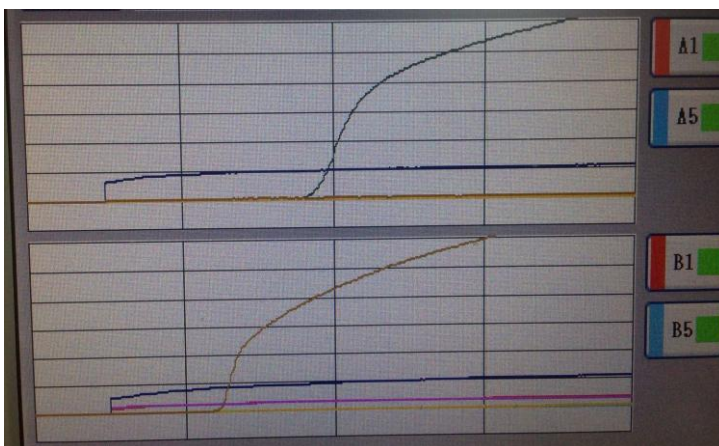

Supplement: MOESM2 [file 11985130]
